# Supplementary material for: Severely Asthmatic Horses Residing in a Mediterranean Climate Shed a Significantly Lower Number of Parasite Eggs Compared to Healthy Farm Mates
Source: MDPI journal article supplement (doi:10.3390/ani13182928), 2023-09-15
Supplement: s1 [file s1]

**Table S1.** Total number of eggs per gram of feces and total number of larvae per gram of feces counted each pair of SEA-Control mates and percentual difference between mates.

| Pair | EPG       |               |                       | LPG       |               |                       |
|------|-----------|---------------|-----------------------|-----------|---------------|-----------------------|
|      | SEA group | Control group | Percentual difference | SEA group | Control group | Percentual difference |
| 1    | 50        | 3050          | 30                    | 10        | 2860          | 28.5                  |
| 2    | 0         | 50            | 0.5                   | 4         | 14            | 0.1                   |
| 3    | 0         | 0             | 0                     | 0         | 0             | 0                     |
| 4    | 550       | 1150          | 6                     | 517       | 807           | 2.9                   |
| 5    | 100       | 1800          | 17                    | 99        | 1766          | 16.67                 |
| 6    | 50        | 50            | 0                     | 0         | 0             | 0                     |
| 7    | 100       | 1750          | 16.5                  | 228       | 3762          | 35.34                 |
| 8    | 0         | 50            | 0.5                   | 0         | 4             | 0.04                  |
| 9    | 0         | 5550          | 55.5                  | 0         | 430           | 4.3                   |
| 10   | 50        | 0             | -0.5                  | 19        | 0             | -0.19                 |
| 11   | 50        | 1000          | 9.5                   | 694       | 1232          | 5.38                  |
| 12   | 0         | 0             | 0                     | 0         | 0             | 0                     |
| 13   | 0         | 0             | 0                     | 0         | 4             | 0.04                  |
| 14   | 400       | 100           | -3                    | 765       | 28            | -7.37                 |
| 15   | 0         | 50            | 0.5                   | 0         | 1766          | 17.66                 |
| 16   | 100       | 1050          | 9.5                   | 7         | 1926          | 19.19                 |
| 17   | 650       | 3550          | 29                    | 773       | 5774          | 50.01                 |
| 18   | 0         | 0             | 0                     | 0         | 0             | 0                     |
| 19   | 50        | 600           | 5.5                   | 3         | 756           | 7.53                  |
| 20   | 0         | 50            | 0.5                   | 0         | 5             | 0.05                  |
